# Supplementary material for: Generation of Highly Functional Hepatocyte-like Organoids from Human Adipose-Derived Mesenchymal Stem Cells Cultured with Endothelial Cells
Source: MDPI journal article supplement (doi:10.3390/cells13060547), 2024-03-20

**A**

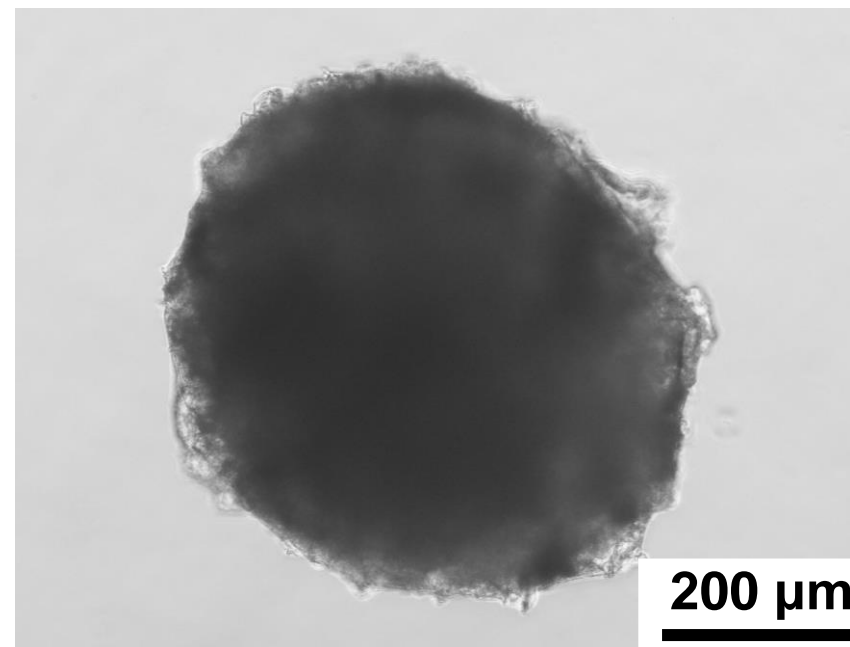

**3D HLCs**

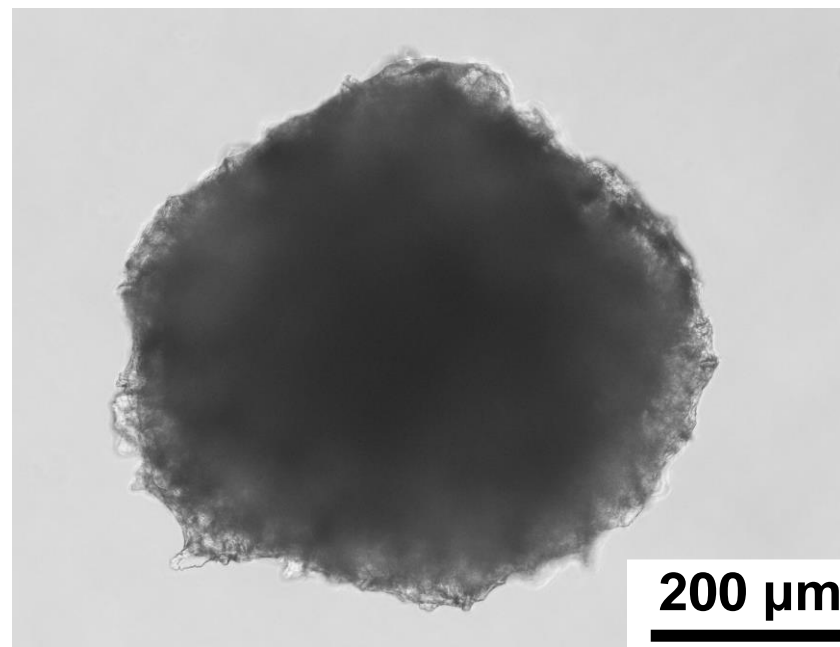

**3D HLCs  
+  
HUVECs (Step 1)**

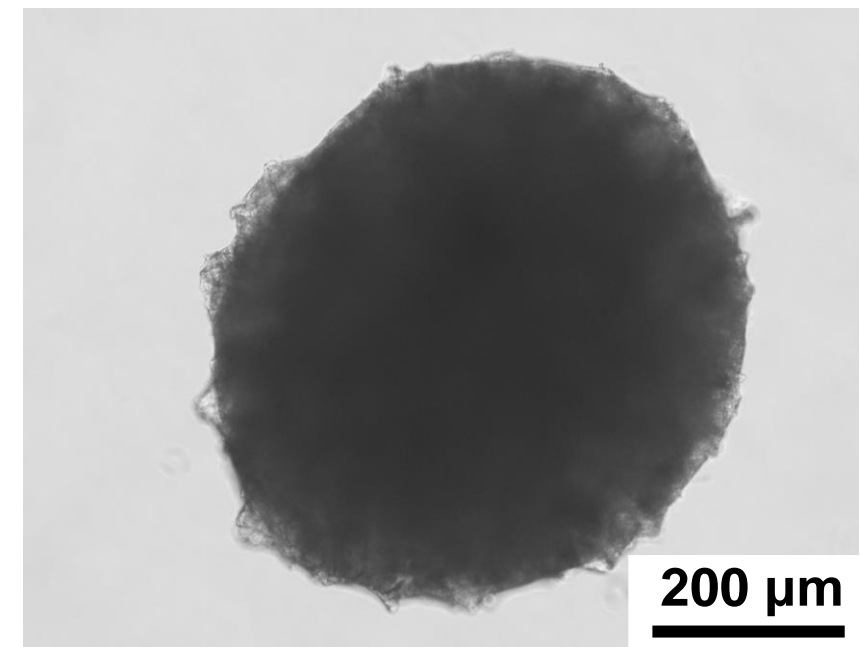

**3D HLCs  
+  
HUVECs (Step 2)**

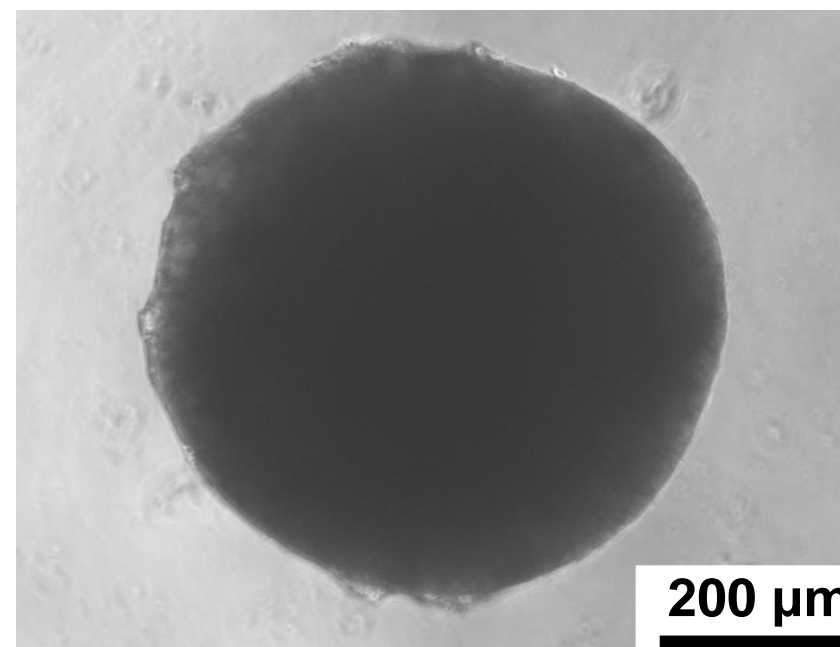

**3D HLCs  
+  
HUVECs (Step 3)**

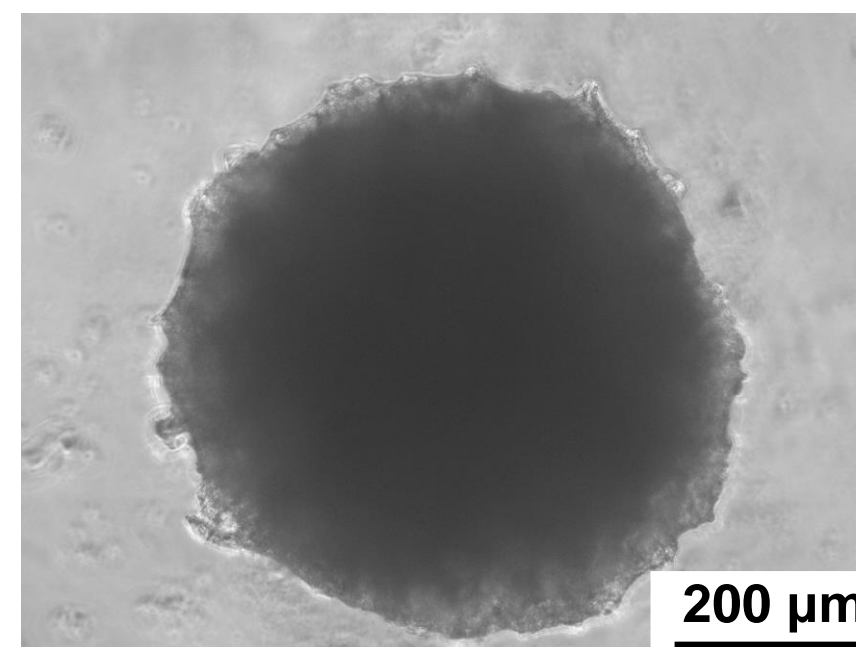

**3D HLCs  
+  
HUVECs (after Step 3)**

**B**

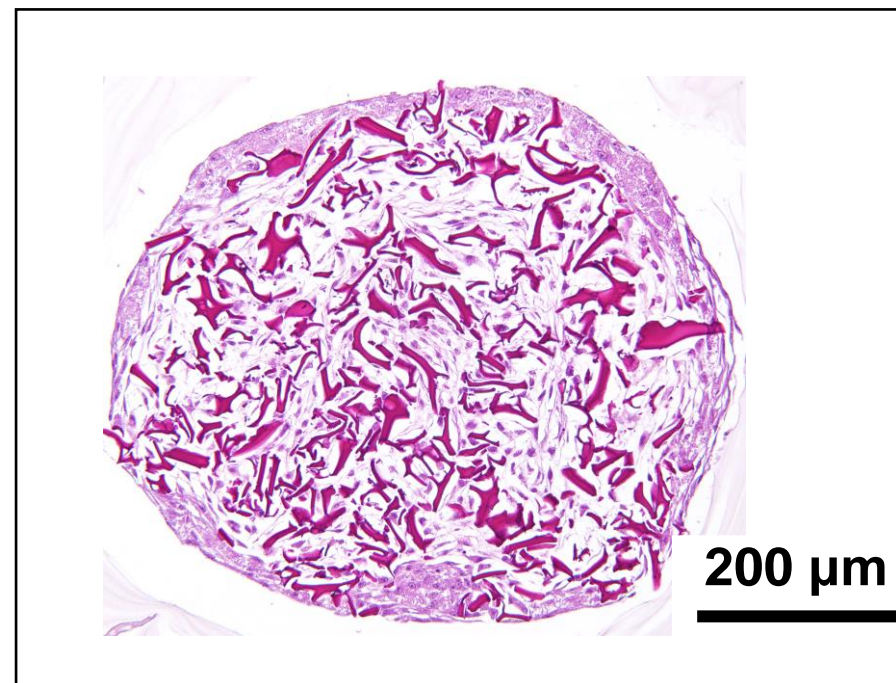

**3D HLCs**

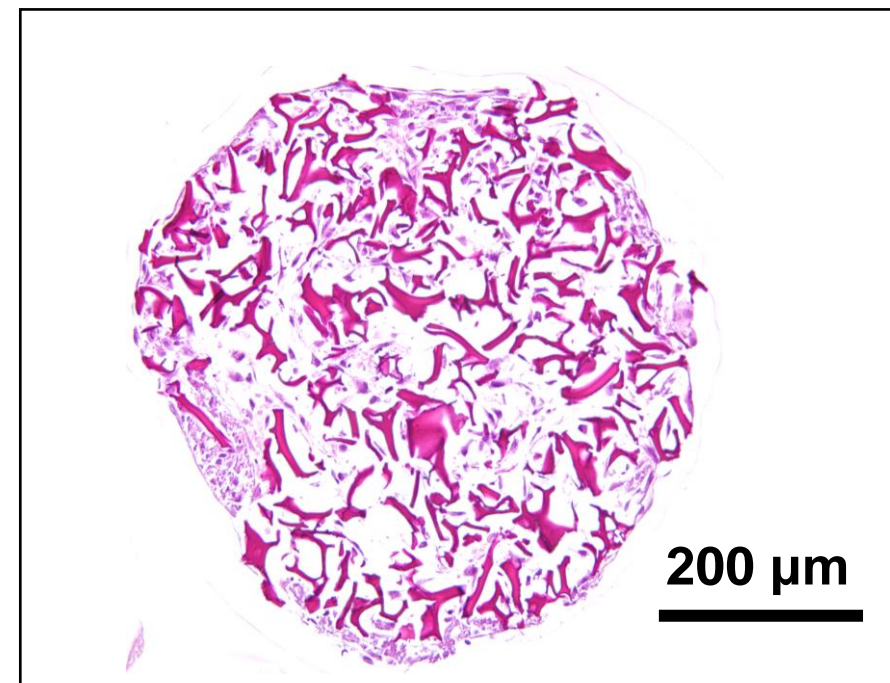

**3D HLCs  
+  
HUVECs (Step 1)**

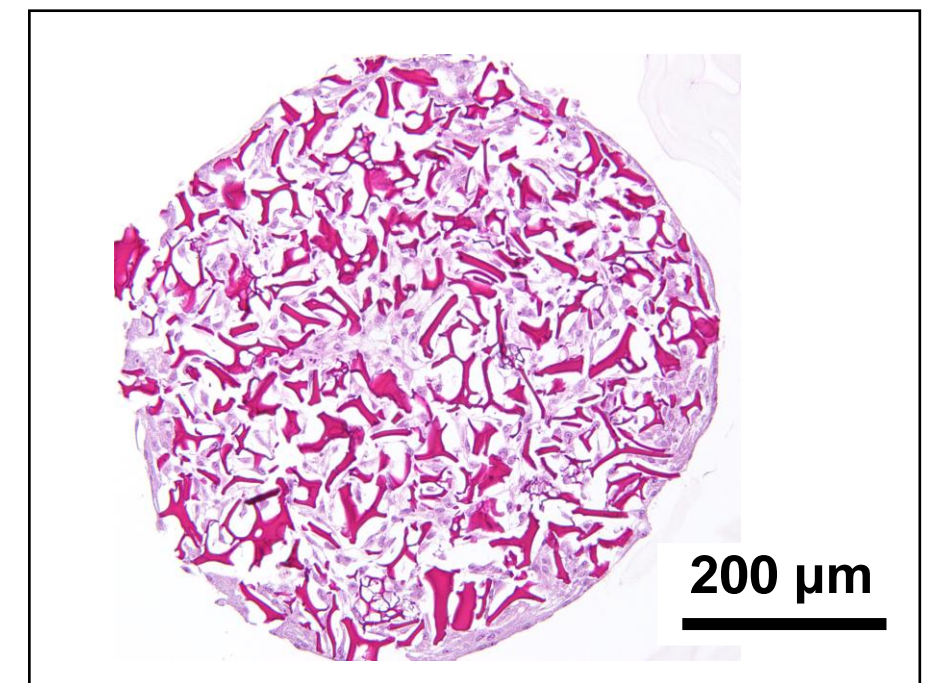

**3D HLCs  
+  
HUVECs (Step 2)**

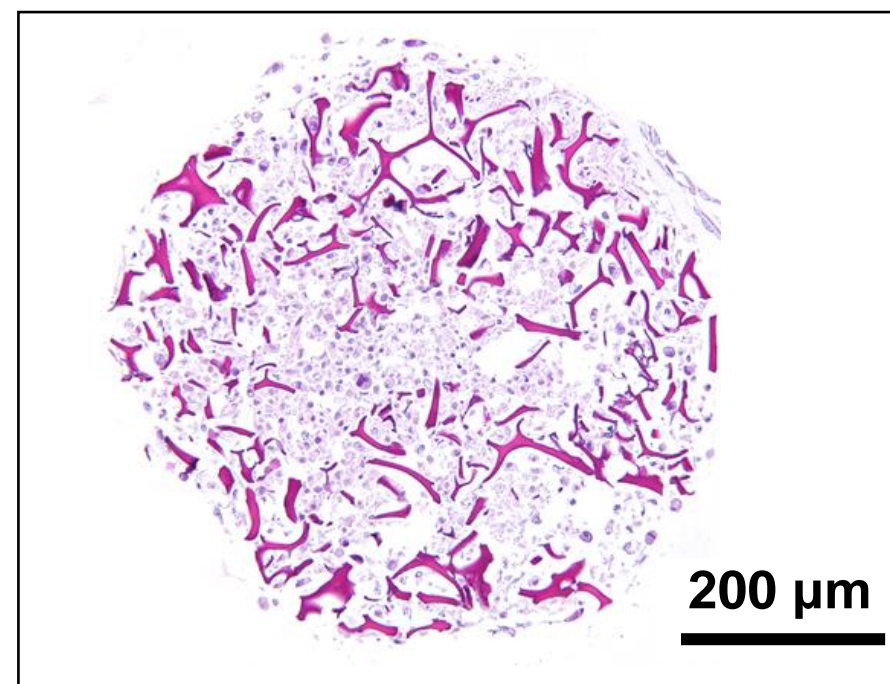

**3D HLCs  
+  
HUVECs (Step 3)**

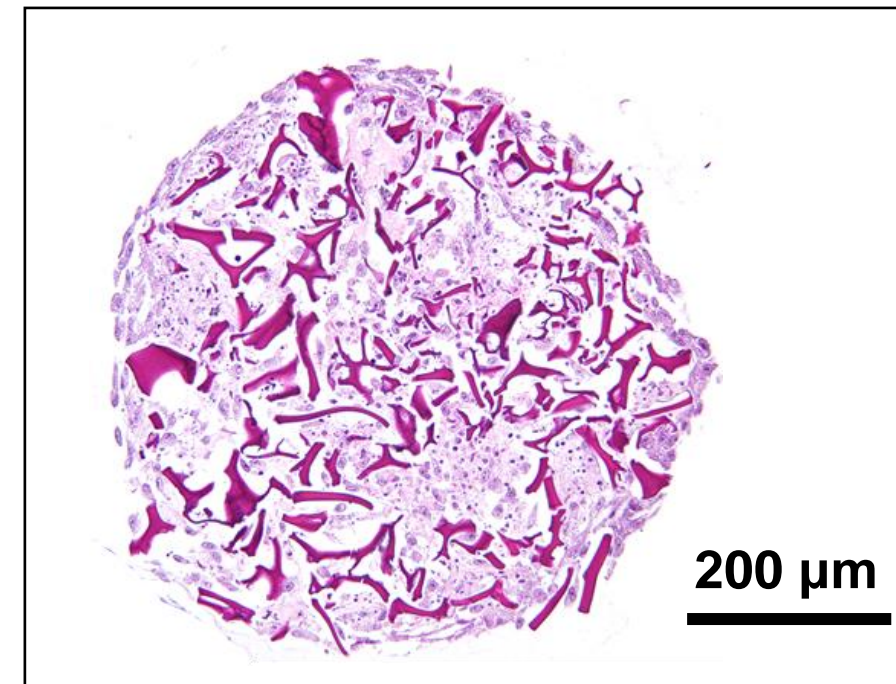

**3D HLCs  
+  
HUVECs (after Step 3)**

**C**

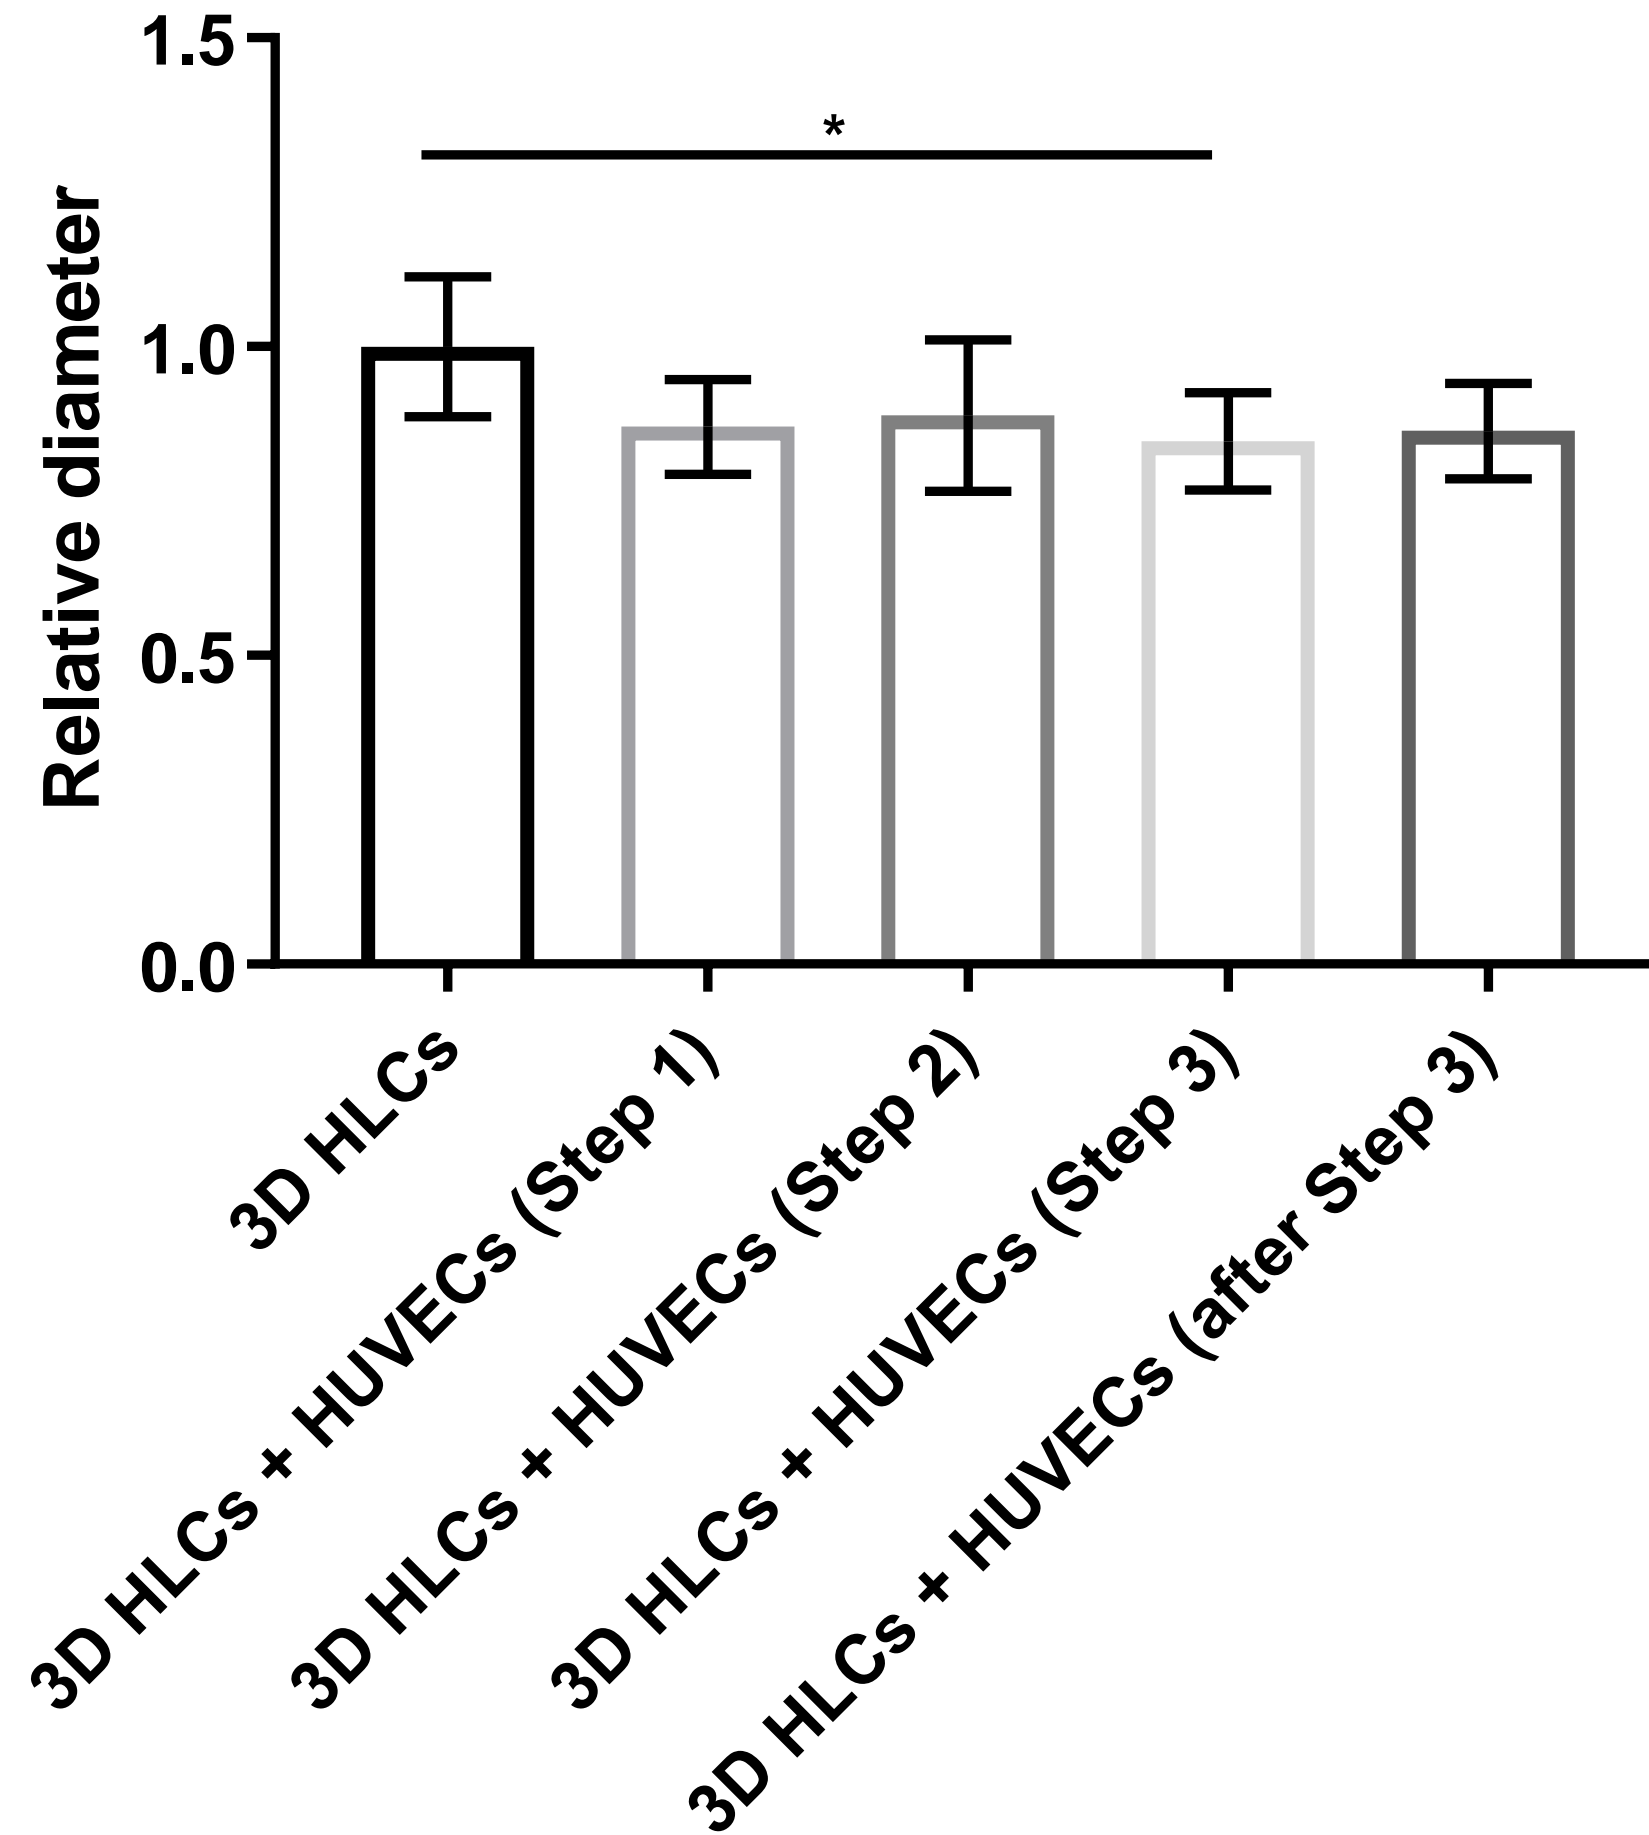

Supplement: s1 [file s1]
